# Supplementary material
Source: HighWire-hosted journal article supplement (https://drc.bmj.com/content/suppl/2023/08/28/11.4.e003561)
Supplement: bmjdrc-2023-003561supp002_data_supplement.pdf [file bmjdrc-2023-003561supp002_data_supplement.pdf]

**S2 Table: Mixed model.**

|                                                         | Unstandardised coefficient |                         | % change in HbA1c per one unit increase in predictor | z    | P-value |
|---------------------------------------------------------|----------------------------|-------------------------|------------------------------------------------------|------|---------|
|                                                         | $\beta$                    | 95% Confidence Interval |                                                      |      |         |
| After Implementation or equivalent period (vs 'before') | 0.042                      | (0.017, 0.068)          | 4.3                                                  | 3.3  | <0.001  |
| Used Flash monitor (vs SMBG)                            | 0.053                      | (0.0012, 0.11)          | 5.5                                                  | 2.0  | 0.045   |
| Interaction 'after' period/Flash monitoring             | -0.054                     | (-0.087, -0.021)        | -5.3                                                 | -3.2 | <0.001  |
|                                                         |                            |                         |                                                      |      |         |
| Age (*) 12-15                                           | 0.082                      | (0.027, 0.14)           | 8.5                                                  | 2.9  | 0.003   |
| Age (*) 16+                                             | 0.18                       | (0.082, 0.27)           | 19                                                   | 3.7  | <0.001  |
|                                                         |                            |                         |                                                      |      |         |
| 2+ (*) years since diagnosis                            | 0.15                       | (0.091, 0.20)           | 16                                                   | 5.2  | <0.001  |
|                                                         |                            |                         |                                                      |      |         |
| HbA1c measured at Lab                                   | 0.053                      | (0.024, 0.082)          | 5.5                                                  | 3.7  | <0.001  |
|                                                         |                            |                         |                                                      |      |         |
| IMD decile 1-4 (vs 5-10)                                | 0.061                      | (0.0096, 0.11)          | 6.3                                                  | 2.3  | 0.02    |
|                                                         |                            |                         |                                                      |      |         |
| Constant                                                | 3.92                       | (3.86, 3.98)            |                                                      | 119  | <0.001  |
|                                                         |                            |                         |                                                      |      |         |
| Random Effects Parameters                               | Estimate                   |                         |                                                      |      |         |
|                                                         |                            |                         |                                                      |      |         |
| Centre Variance                                         | 0.00                       | (0.00, 0.019)           |                                                      |      |         |
| Patient Variance                                        | 0.028                      | (0.022, 0.035)          |                                                      |      |         |
| Residual Variance                                       | 0.015                      | (0.014, 0.017)          |                                                      |      |         |

(\*) At implementation date/ equivalent date

Dependent variable is  $\log_e(\text{HbA1c})$ . Model coefficients are on the natural log-scale; results were back-transformed, that is exponentiated, to obtain percentage differences in HbA1c.

After adjustment, for controls the natural log of HbA1c increased by 0.042 from before to after periods, equivalent to a 4.3% increase in HbA1c ( $e^{0.042}$ ). For the flash monitoring group, the natural log of HbA1c decreased by the natural log 0.012 ( $=0.042-0.054$ ) from before to after periods. This is equivalent to a decrease of (-) 1.2% in HbA1c ( $1-e^{(0.042-0.054)}$ ).
